# Supplementary material for: Health spending and vaccination coverage in low-income countries
Source: PubMed Central journal article supplement (PMC8103936; doi:10.1136/bmjgh-2020-004823), 2021-05-05
Supplement: bmjgh-2020-004823supp001.pdf [file bmjgh-2020-004823supp001.pdf]

# Supplemental Materials: Health spending and vaccination coverage in low-income countries

Francisco Castillo-Zunino,<sup>a</sup> Pinar Keskinocak,<sup>a</sup> Dima Nazzal,<sup>a</sup> Matthew C Freeman<sup>b</sup>

<sup>a</sup>H. Milton Stewart School of Industrial and Systems Engineering, Georgia Institute of Technology, Atlanta, GA, USA.

<sup>b</sup>Rollins School of Public Health, Emory University, Atlanta, GA, USA.

## Tables

Table 1: Summary of data sources

| Data source         |                                                                    | Variable                                                            | Missing data % | Time period |
|---------------------|--------------------------------------------------------------------|---------------------------------------------------------------------|----------------|-------------|
| Short               | Full                                                               |                                                                     |                |             |
| WU1 <sup>1</sup>    | WHO-UNICEF: estimates of national infant immunization coverage     | DTP1 coverage                                                       | 0              | 2000–18     |
|                     |                                                                    | DTP3 coverage                                                       | 0              |             |
|                     |                                                                    | MCV1 coverage                                                       | 0              |             |
|                     |                                                                    | BCG coverage                                                        | 0              |             |
|                     |                                                                    | Pol3 coverage                                                       | 0              |             |
| WB1 <sup>2</sup>    | World Bank: world development indicators                           | GNI per capita                                                      | 0              | 2000–18     |
|                     |                                                                    | GDP per capita                                                      | 0              |             |
|                     |                                                                    | Population                                                          | 0              |             |
|                     |                                                                    | Land area                                                           | 0              |             |
|                     |                                                                    | Live birth rate                                                     | 0              |             |
| UNDP1 <sup>3</sup>  | UN Development Programme: human development reports                | Mean years of schooling, female                                     | 4.2            | 2014–18     |
| IHME1 <sup>4</sup>  | IHME: global health spending 1995–2016                             | Total health spending per capita                                    | 0              | 2000–16     |
|                     |                                                                    | Government health spending per capita                               | 0              |             |
|                     |                                                                    | Out-of-pocket health spending per capita                            | 0              |             |
|                     |                                                                    | Prepaid private health spending per capita                          | 0              |             |
|                     |                                                                    | DAH per capita                                                      | 0              |             |
| IHME2 <sup>5*</sup> | IHME: development assistance for health database 1990–2018         | DAH per live birth on newborn & child health                        | 0              | 2000–17     |
|                     |                                                                    | DAH per live birth on newborn & child health vaccines               | 0              |             |
| WU2 <sup>6*</sup>   | WHO-UNICEF joint reporting form: immunization financing indicators | Total spending per live birth on routine immunization vaccines      | 10.1           | 2006–17     |
|                     |                                                                    | Government spending per live birth on routine immunization vaccines | 5.2            |             |

\* With data source WB1 we calculated per live birth values (using population and live birth rate).

Missing data is calculated as the percentage of country-year samples missing among LIC data for the specified time period.

Table 2: Country groups with ISO3 codes by Gavi co-financing transition status (2018):

| LIC+                    |                         | LIC-                     |                       |                           |  |
|-------------------------|-------------------------|--------------------------|-----------------------|---------------------------|--|
| Initial self-financing: | Preparatory transition: | Initial self-financing:  |                       | Preparatory transition:   |  |
| Burundi BDI             | Tajikistan TJK          | Benin BEN                | Mali MLI              | Yemen, Rep. YEM           |  |
| Burkina Faso BFA        |                         | Central African Rep. CAF | Mozambique MOZ        |                           |  |
| Gambia GMB              |                         | Congo, Dem. Rep. COD     | Malawi MWI            |                           |  |
| Nepal NPL               |                         | Ethiopia ETH             | Niger NER             |                           |  |
| Rwanda RWA              |                         | Guinea GIN               | Sierra Leone SLE      |                           |  |
| Tanzania TZA            |                         | Guinea-Bissau GNB        | Chad TCD              |                           |  |
| Uganda UGA              |                         | Haiti HTI                | Togo TGO              |                           |  |
|                         |                         | Madagascar MDG           |                       |                           |  |
| LMIC                    |                         |                          |                       |                           |  |
| Initial self-financing: | Preparatory transition: | Accelerated transition:  | Fully self-financing: | Not Gavi eligible:        |  |
| Senegal SEN             | Bangladesh BGD          | Angola AGO               | India IND             | Egypt, AR EGY             |  |
| Zimbabwe ZWE            | Côte d'Ivoire CIV       | Bolivia BOL              | Lao PDR LAO           | Morocco MAR               |  |
|                         | Cameroon CMR            | Congo, Rep. COG          | Nigeria NGA           | Philippines PHL           |  |
|                         | Ghana GHA               | Honduras HND             | Nicaragua NIC         | Palestinian Territory PSE |  |
|                         | Kenya KEN               | Indonesia IDN            | Papua New Guinea PNG  | El Salvador SLV           |  |
|                         | Kyrgyz Rep. KGZ         | Moldova, Rep. MDA        | Uzbekistan UZB        | Swaziland SWZ             |  |
|                         | Cambodia KHM            | Mongolia MNG             | Vietnam VNM           | Tunisia TUN               |  |
|                         | Lesotho LSO             |                          |                       | Ukraine UKR               |  |
|                         | Mauritania MRT          |                          |                       |                           |  |
|                         | Pakistan PAK            |                          |                       |                           |  |
|                         | Sudan SDN               |                          |                       |                           |  |
|                         | Zambia ZMB              |                          |                       |                           |  |

Table 3: Summary of other financial indicators' change rates of country groups

| Indicator (US\$)                                     | Year range | Intercept coefficients |                                   | Slope coefficients & p-values |                                   |               |               |               | Trend comparison p-values |               |               |
|------------------------------------------------------|------------|------------------------|-----------------------------------|-------------------------------|-----------------------------------|---------------|---------------|---------------|---------------------------|---------------|---------------|
|                                                      |            | LIC+<br>$\alpha_{00}$  | LIC-<br>$\alpha_{00}+\alpha_{01}$ | LIC+<br>$\alpha_{10}$         | LIC-<br>$\alpha_{10}+\alpha_{11}$ | $\chi^2$      | KR            | PB            | $\chi^2$                  | KR            | PB            |
| GDP per capita <sup>a</sup>                          | 00-18      | 224<br>(65.4)          | 296<br>(80.1)                     | 32.24<br>(1.68)               | 25.11<br>(2.06)                   | <b>0.0006</b> | <b>0.0006</b> | <b>0.0009</b> | <b>0.0026</b>             | <b>0.0047</b> | <b>0.0046</b> |
| GNI per capita <sup>b</sup>                          | 00-18      | 214<br>(61.43)         | 264<br>(75.23)                    | 33.27<br>(1.67)               | 25.87<br>(2.04)                   | <b>0.0003</b> | <b>0.0003</b> | <b>0.0007</b> | <b>0.0015</b>             | <b>0.0029</b> | <b>0.0032</b> |
| Total health spending per capita <sup>c</sup>        | 00-16      | 22.7<br>(5.89)         | 28.6<br>(7.22)                    | 1.37<br>(0.14)                | 0.73<br>(0.17)                    | <b>0.0001</b> | <b>0.0002</b> | <b>0.0002</b> | <b>0.0007</b>             | <b>0.0016</b> | <b>0.0018</b> |
| Private spending per capita <sup>c</sup>             | 00-16      | 12.36<br>(4.44)        | 16.61<br>(5.44)                   | 0.32<br>(0.07)                | 0.19<br>(0.09)                    | 0.14          | 0.15          | 0.15          | 0.28                      | 0.30          | 0.30          |
| DAH per capita <sup>c</sup>                          | 00-16      | 4.39<br>(2.08)         | 2.93<br>(2.54)                    | 0.74<br>(0.09)                | 0.69<br>(0.11)                    | 0.65          | 0.65          | 0.65          | 0.65                      | 0.67          | 0.67          |
| DAH per birth on newborn & child health <sup>c</sup> | 00-17      | 5.21<br>(7.64)         | 1.31<br>(9.36)                    | 4.35<br>(0.44)                | 4.59<br>(0.54)                    | 0.65          | 0.66          | 0.65          | 0.88                      | 0.88          | 0.88          |

Each financial indicator was fitted by a linear mixed-effects regression model. The table shows the intercept and slope coefficients of LIC+ ( $\alpha_{00}$  and  $\alpha_{10}$ ) and LIC- ( $\alpha_{00}+\alpha_{01}$  and  $\alpha_{10}+\alpha_{11}$ ) with their standard error in parentheses.  $\chi^2$ , KR, and PB represent the p-values of an asymptotic  $\chi^2$  test, a Kenward-Roger approximation for F tests for reduction of mean structure, and a parametric bootstrap method (10,000 simulations) respectively<sup>7</sup>. There are two types of p-values presented: the first corresponds to the significance of the slope coefficient  $\alpha_{11}$ , i.e., if the yearly change rate of LIC+ is significantly different from the yearly change rate of LIC-. The second type of p-values compare the overall trends of LIC+ and LIC-, i.e., it does not refer to the significance of a specific coefficient but to the significance of intercept and slope combined. p-values below 0.05 are highlighted in bold.

<sup>a</sup> current US\$.

<sup>b</sup> US\$ using World Bank Atlas method.

<sup>c</sup> constant 2018 US\$.

## Code implementation

We implemented all linear mixed-effects models with the R library *lme4*<sup>8</sup> by running the code

$$lmer(var \sim year * group + (1|country), data = sample) \quad (1)$$

where *var* represents the variable being fitted over time, *sample* represents the set with all data points, and the rest represent the *year*, *country*, and *group* (LIC+, LIC-, or LMIC) of the data points.

To compare the slope coefficients (change rate per year) between LIC+ and LIC-, we used the following code in R to calculate p-values using library *pbkrtest*<sup>7</sup>:

$$model1 = lmer(var \sim year * group + (1|country), data = sample) \quad (2)$$

$$model2 = lmer(var \sim year + group + (1|country), data = sample) \quad (3)$$

$$anova(model1, model2) \quad (4)$$

$$KRmodcomp(model1, model2) \quad (5)$$

$$PBmodcomp(model1, model2, nsim = 10000) \quad (6)$$

In this case, *sample* only includes LIC. Line (2) defines the complete mixed-effects model that considers intercept and slopes for each country group (LIC+ and LIC-) with mixed-effects for each country. Line (3) shows a reduced version of the first model where country groups have different intercepts but share the same slope – comparing both models tells you if group specific slopes are statistically relevant or not (corresponds to the p-value of coefficient  $\alpha_{11}$  as defined in the paper). Both models in (2) and (3) are compared in lines (4), (5), and (6) by computing the asymptotic  $\chi^2$  test, the Kenward-Roger approximation, and parametric bootstrap<sup>7</sup>, respectively. Line (6) runs 10,000 parametric bootstrap replications to obtain a good estimate.

We also compared the overall trends between LIC+ and LIC-, namely compared both the intercept and slope coefficients of country groups simultaneously. The code is almost identical to (2)-(6), except for line (3) that was replaced by:

$$model2 = lmer(var \sim year + (1|country), data = sample) \quad (7)$$

Line (7) shows a reduced version of the model in line (2), where there is no grouping coefficients only shared intercept and slope.

To calculate and plot the 95% confidence intervals of LIC+ and LIC- trends we used function *bootMer* (from *lme4* library<sup>8</sup>) with 10,000 parametric bootstrap simulations.

## Additional figures

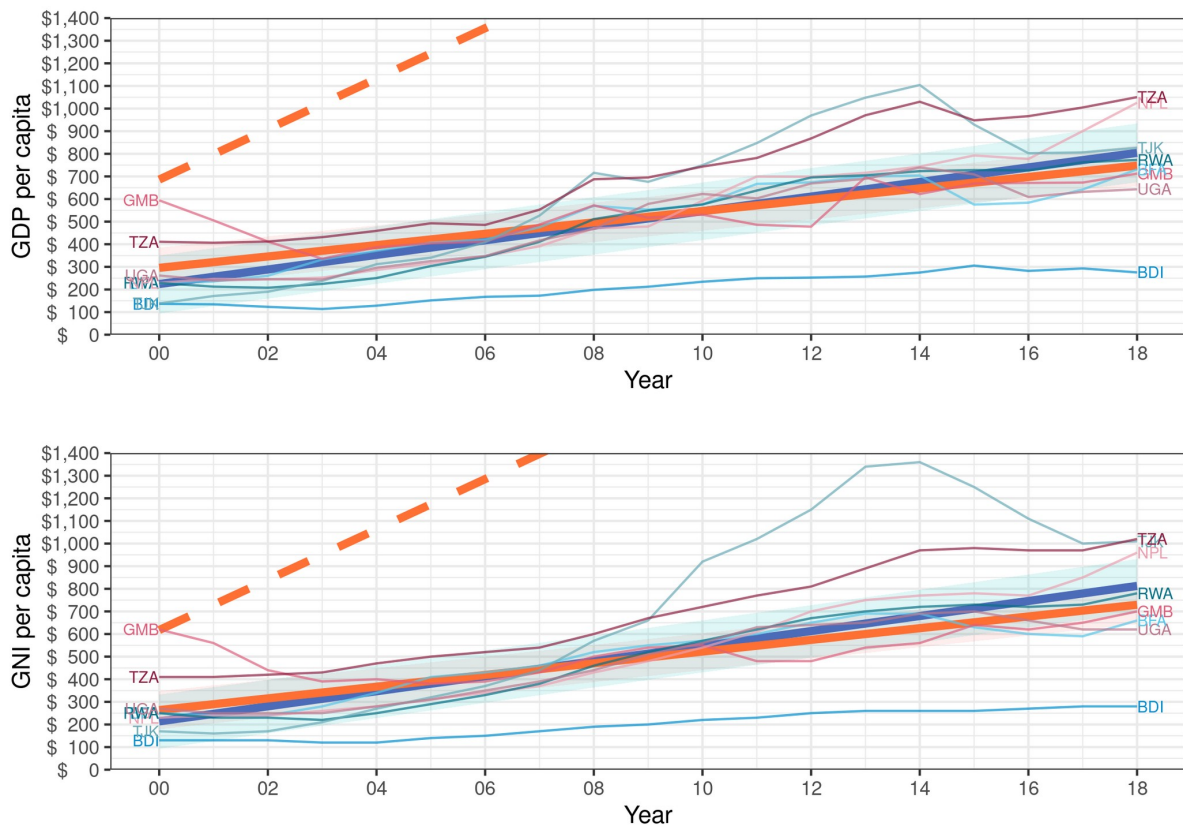

Figure 1: GDP & GNI per capita of country groups

Data source: WB1. GDP per capita is in current US\$, GNI per capita is in US\$ using World Bank Atlas method. The trends of LIC+, LIC-, and LMIC were fitted by linear mixed-effects models; note part of LMIC trends were cut off for visibility. Confidence intervals of 95% surround LIC+ and LIC- trends and were computed through a parametric bootstrap method for mixed-effects models (10,000 simulations). LIC+ countries (ISO3): Burundi (BDI), Burkina Faso (BFA), Gambia (GMB), Nepal (NPL), Rwanda (RWA), Tajikistan (TJK), Tanzania (TZA), and Uganda (UGA).

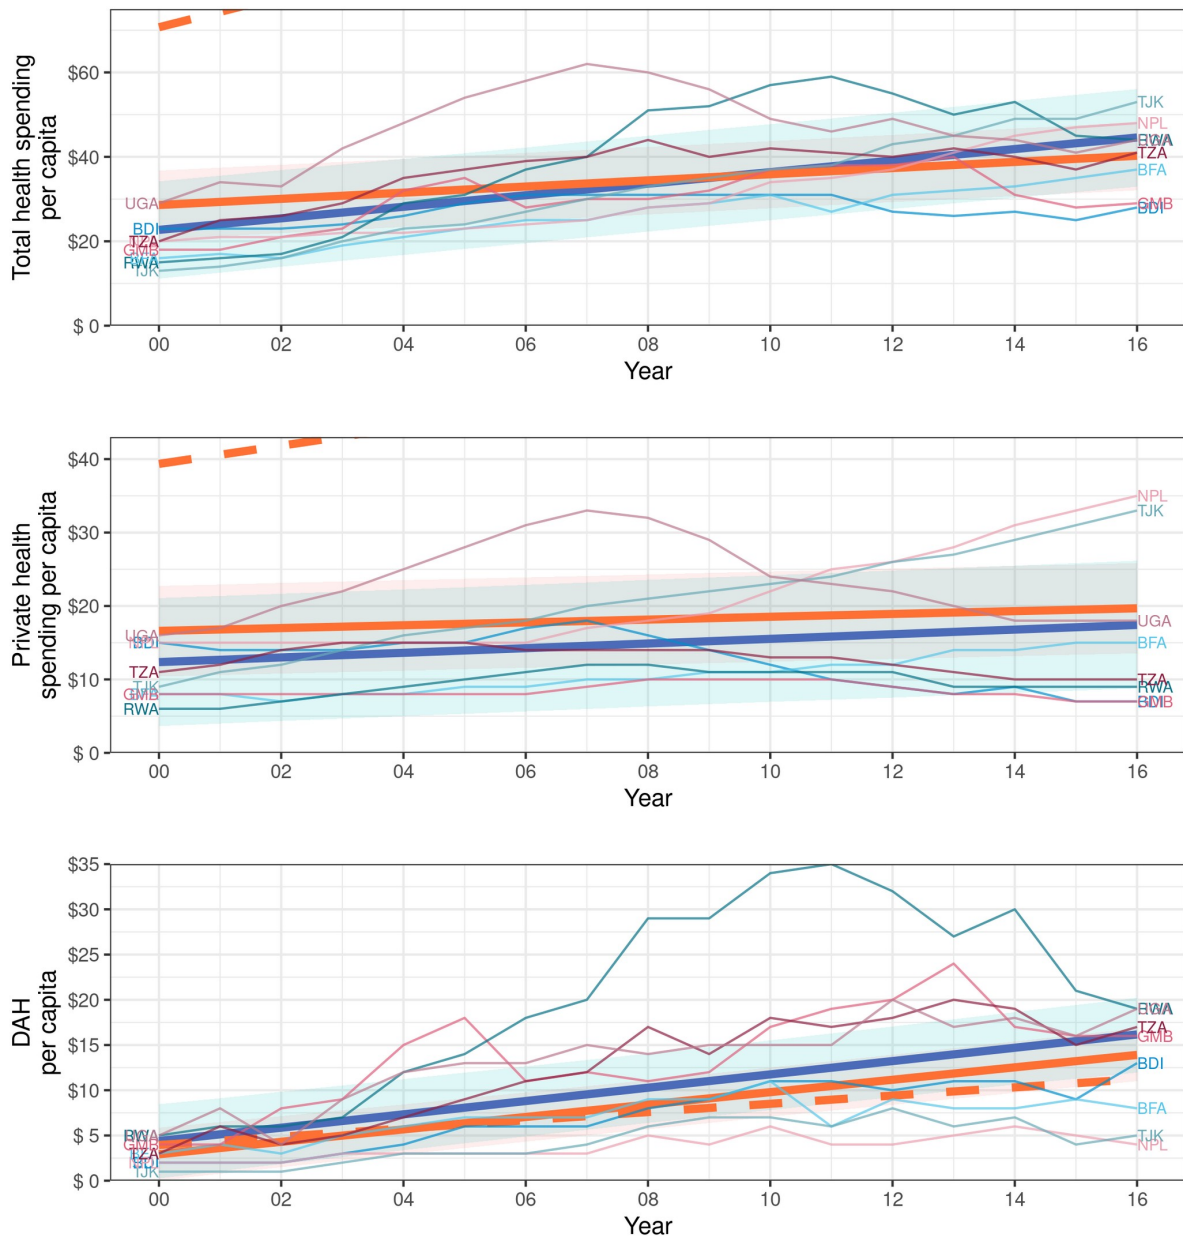

Figure 2: Total/private health spending and DAH per capita of country groups

Data source: IHME1. All spendings are in constant 2018 US\$. The trends of LIC+, LIC-, and LMIC were fitted by linear mixed-effects models; note part of LMIC trends were cut off for visibility. Confidence intervals of 95% surround LIC+ and LIC- trends and were computed through a parametric bootstrap method for mixed-effects models (10,000 simulations). LIC+ countries (ISO3): Burundi (BDI), Burkina Faso (BFA), Gambia (GMB), Nepal (NPL), Rwanda (RWA), Tajikistan (TJK), Tanzania (TZA), and Uganda (UGA).

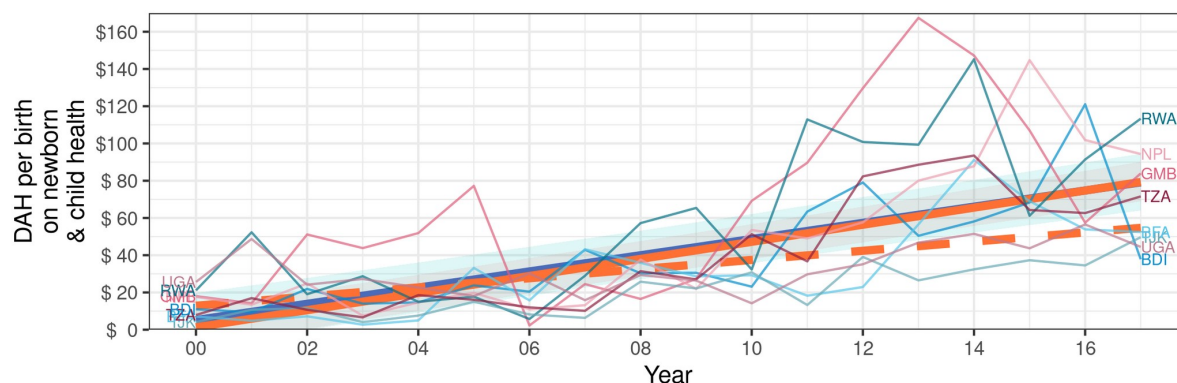

Figure 3: DAH per birth on newborn & child health of country groups

Data source: IHME2. Indicator is in constant 2018 US\$. The trends of LIC+, LIC-, and LMIC were fitted by linear mixed-effects models. Confidence intervals of 95% surround LIC+ and LIC- trends and were computed through a parametric bootstrap method for mixed-effects models (10,000 simulations). LIC+ countries (ISO3): Burundi (BDI), Burkina Faso (BFA), Gambia (GMB), Nepal (NPL), Rwanda (RWA), Tajikistan (TJK), Tanzania (TZA), and Uganda (UGA).

## References

- 1 WHO-UNICEF. WHO and UNICEF estimates of national infant immunization coverage, 2019. <https://data.unicef.org/resources/dataset/immunization/> (accessed Jan 27, 2020).
- 2 World Bank. World development indicators, 2019. <https://data.worldbank.org> (accessed Jan 27, 2020).
- 3 United Nations Development Programme. Human development reports, 2020. <http://hdr.undp.org/en/data> (accessed Mar 3, 2021).
- 4 IHME. Global health spending 1995–2016, 2019. <http://ghdx.healthdata.org/record/ihme-data/global-health-spending-1995-2016> (accessed Jan 27, 2020).
- 5 IHME. Development assistance for health database 1990–2018, 2019. <http://ghdx.healthdata.org/record/ihme-data/development-assistance-health-database-1990-2018> (accessed Jan 27, 2020).
- 6 WHO-UNICEF. WHO-UNICEF joint reporting form: immunization financing indicators, 2019. [https://www.who.int/immunization/programmes\\_systems/financing/data\\_indicators/en/](https://www.who.int/immunization/programmes_systems/financing/data_indicators/en/) (accessed Jan 27, 2020).
- 7 Halekoh U, Højsgaard S. A Kenward-Roger approximation and parametric bootstrap methods for tests in linear mixed models—the R package pbrtest. *Journal of Statistical Software* 2014; **59**: 1–30.
- 8 Bates D, Machler M, Bolker B, Walker S. Fitting linear mixed-effects models using lme4. *arXiv preprint* 2014; arXiv:1406.5823.
- 9 Halekoh U, Højsgaard S. A Kenward-Roger approximation and parametric bootstrap methods for tests in linear mixed models—the R package pbrtest. *Journal of Statistical Software* 2014; **59**: 1–30.
